# Methylenetetrahydrofolate reductase tagging polymorphisms are associated with risk of esophagogastric junction adenocarcinoma: a case-control study involving 2,740 Chinese Han subjects

Guowen Ding<sup>1,\*</sup>, Yafeng Wang<sup>2,\*</sup>, Yu Chen<sup>3,\*</sup>, Jun Yin<sup>1</sup>, Chao Liu<sup>1</sup>, Yu Fan<sup>4</sup>, Hao Qiu<sup>5</sup>, Weifeng Tang<sup>6</sup> and Shuchen Chen<sup>6</sup>

<sup>1</sup>Department of Cardiothoracic Surgery, Affiliated People's Hospital of Jiangsu University, Zhenjiang, Jiangsu Province, China

<sup>2</sup>Department of Cardiology, The People's Hospital of Xishuangbanna Dai Autonomous Prefecture, Jinghong, Yunnan Province, China

<sup>3</sup>Department of Medical Oncology, Fujian Cancer Hospital, Fujian Medical University Cancer Hospital, Fuzhou, Fujian Province, China

<sup>4</sup>Department of Medical Oncology, Affiliated People's Hospital of Jiangsu University, Zhenjiang, Jiangsu Province, China

<sup>5</sup>Department of Immunology, School of Medicine, Jiangsu University, Zhenjiang, Jiangsu Province, China

<sup>6</sup>Department of Thoracic Surgery, Fujian Medical University Union Hospital, Fuzhou, Fujian Province, China

\*These authors have contributed equally to this work

Correspondence to: Shuchen Chen, email: cscdoctor@163.com  
Weifeng Tang, email: twf001001@126.com

**Keywords:** MTHFR; polymorphism; esophagogastric junction adenocarcinoma; risk

**Received:** May 16, 2017

**Accepted:** November 13, 2017

**Published:** December 01, 2017

**Copyright:** Ding et al. This is an open-access article distributed under the terms of the Creative Commons Attribution License 3.0 (CC BY 3.0), which permits unrestricted use, distribution, and reproduction in any medium, provided the original author and source are credited.

## ABSTRACT

In this study, we aimed to determine the potential association of *MTHFR* tagging single nucleotide polymorphisms (SNPs) with risk of developing esophagogastric junction adenocarcinoma (EGJA). *MTHFR* rs1801133 G>A, rs3753584 T>C, rs4845882 G>A, rs4846048 A>G and rs9651118 T>C polymorphisms were genotyped in 1,677 healthy individuals and 1,063 patients with EGJA. We found that *MTHFR* rs1801133 G>A polymorphism was significantly associated with the risk of developing EGJA (AA vs. GG: adjusted  $P = 0.001$ ; GA/AA vs. GG: adjusted  $P = 0.007$  and AA vs. GA/GG: adjusted  $P = 0.001$ ). However, for *MTHFR* rs4845882 G>A polymorphism, the decreased risk of EGJA was found in two genetic models (AA vs. GG: adjusted  $P = 0.002$  and AA vs. GA/GG: adjusted  $P = 0.005$ ). In addition, for *MTHFR* rs3753584 T>C and rs9651118 T>C polymorphisms, a tendency to decreased risk of EGJA was noted. In a subgroup analysis, a significantly decreased risk of EGJA in <64 years subgroup was identified. We found that *MTHFR* G<sub>rs1801133</sub>T<sub>rs3753584</sub>G<sub>rs4845882</sub>A<sub>rs4846048</sub>C<sub>rs9651118</sub>/G<sub>rs1801133</sub>C<sub>rs3753584</sub>A<sub>rs4845882</sub>A<sub>rs4846048</sub>T<sub>rs9651118</sub> and G<sub>rs1801133</sub>T<sub>rs3753584</sub>A<sub>rs4845882</sub>G<sub>rs4846048</sub>T<sub>rs9651118</sub> haplotypes significantly decreased the risk of EGJA ( $P = 0.002$ ,  $P < 0.001$  and  $P = 0.038$ , respectively). In conclusion, our study demonstrates that *MTHFR* rs1801133 G>A may be associated with the increased risk of EGJA. Meanwhile, *MTHFR* rs3753584 T>C, rs4845882 G>A and rs9651118 T>C polymorphisms and haplotypes may decrease the risk of EGJA in Eastern Chinese Han population. Further studies with large sample size and detailed gene-environmental data are needed to validate our conclusion.

## INTRODUCTION

The increasing incidence of esophagogastric junction adenocarcinoma (EGJA) was observed worldwide [1–3] and was considered to have different etiology and risk factor compared with distal gastric carcinoma (GC) [4]. EGJA remains poor prognosis [5] and is a common public health problem. The vital risk factors contributing to the development of EGJA are obesity, gastro-esophageal reflux disease, smoking, foods preserved by salting and low intake of fruits and vegetables *et al* [6, 7]. However, these observed risk factors could not interpret the overall susceptibility to EGJA. Recently, more and more epidemiologic studies suggested that individual's genetic factor might influence the pathogenesis of EGJA.

Accumulating evidences indicate that folate insufficiency may increase the susceptibility of multiple malignancies [8, 9]. In humans, the majority of methyl groups may be presented by folic acid for endocellular methylation reactions and DNA de novo deoxynucleoside synthesis. During DNA synthesis, lack of folate can cause uracil misincorporation and then affect the stability of DNA [10]. In folate metabolism and DNA synthesis, methylenetetrahydrofolate reductase (MTHFR) is an important enzyme which catalyzes the revivification of 5,10-methylenetetrahydrofolate to 5-methyltetrahydrofolate. And 5-methyltetrahydrofolate is a main circulating and existing form of folate and is the methyl donor for DNA methylation and remethylation procedure of homocysteine to methionine. Based on the important role of participation in both DNA synthesis and methylation, any variant of *MTHFR* gene may involve in the carcinogenesis.

Human MTHFR is composed of 656 amino acids. *MTHFR* gene is located on the short arm of Chromosome 1. The human *MTHFR* gene is very polymorphic (<http://www.ncbi.nlm.nih.gov/SNP>) and a number of loci have been established, such as rs1537514, rs3753584, rs9651118, rs1537516, rs4845882, rs1801131, rs1801133, rs2066462, rs4846048 and rs3737967 polymorphisms, etc. Interestingly, many previous case-control studies demonstrated that *MTHFR* polymorphisms were correlated with the risk of multiple human malignancies [e.g., esophageal squamous cell carcinoma (ESCC) [11], gastric cardia adenocarcinoma (GCA) [12], cervicalcancer [13], breast cancer [14, 15] and childhood acute lymphoblastic leukemia [16] *et al*]. Thus, the single nucleotide polymorphisms (SNPs) in *MTHFR* genes on EGJA risk attracted our interest. Exploring the potential association of *MTHFR* SNPs with EGJA susceptibility may be conducive to the prevention and personalized diagnosis. In this study, we selected *MTHFR* tagging SNPs (rs1801133 G>A, rs3753584 T>C, rs4845882 G>A, rs4846048 A>G and rs9651118 T>C) and performed a case-control study to evaluate the effect of *MTHFR* genotypes for EGJA risk.

## RESULTS

### Baseline characteristics

A total of 1,063 sporadic patients with EGJA and 1,677 normal controls were recruited. Of the EGJA patients, 759 were male and 304 were female, with a mean age ( $\pm$  standard deviation) of 64.19  $\pm$  8.63 years. The normal controls comprised of 1,194 males and 483 females with a mean age of 63.91  $\pm$  10.22 years. The demographics (age and sex) was well matched ( $P = 0.165$  and  $P = 0.909$ , respectively; Table 1). Of the smoking and alcohol consumption, a significant difference was observed between EGJA patients and controls ( $P < 0.001$ , Table 1). The frequency distribution of *MTHFR* genotypes was determined after genotyping the 2,740 study subjects. For *MTHFR* rs1801133 G>A, rs3753584 T>C, rs4845882 G>A, rs4846048 A>G and rs9651118 T>C polymorphisms, success rates of genotyping were 99.01%, 99.09%, 99.05%, 99.09% and 98.98%, respectively (Table 2). In controls, the distribution of *MTHFR* genotype frequencies accorded with Hardy–Weinberg equilibrium (HWE), except for *MTHFR* rs4846048 A>G polymorphism (Table 2).

### Association of *MTHFR* rs1801133 G>A, rs3753584 T>C, rs4845882 G>A, rs4846048 A>G and rs9651118 T>C polymorphisms with EGJA

The genotypes of *MTHFR* rs1801133 G>A, rs3753584 T>C, rs4845882 G>A, rs4846048 A>G and rs9651118 T>C polymorphisms are presented in Table 3. For *MTHFR* rs1801133 G>A polymorphism, the risk of developing EGJA was significant in three genetic models [AA vs. GG: crude odds ratio (OR) = 1.50, 95% confidence interval (CI): 1.19–1.90,  $P = 0.001$ ; GA/AA vs. GG: crude OR = 1.27, 95% CI: 1.08–1.49,  $P = 0.004$  and AA vs. GA/GG: crude OR = 1.45, 95% CI: 1.17–1.80,  $P = 0.001$ ; Table 3]. Adjustment for age, sex, smoking and drinking, the similar results were also found (AA vs. GG: adjusted OR = 1.47, 95% CI: 1.16–1.86,  $P = 0.001$ ; GA/AA vs. GG: adjusted OR = 1.25, 95% CI: 1.06–1.47,  $P = 0.007$  and AA vs. GA/GG: adjusted OR = 1.43, 95% CI: 1.15–1.77,  $P = 0.001$ ; Table 3). For *MTHFR* rs4845882 G>A polymorphism, the decreased risk of EGJA was found in two genetic models (AA vs. GG: crude OR = 0.47, 95% CI: 0.29–0.75,  $P = 0.002$  and AA vs. GA/GG: crude OR = 0.50, 95% CI: 0.31–0.80,  $P = 0.004$ ; Table 3). Adjustment for age, sex, smoking and drinking, the results were not materially changed (AA vs. GG: adjusted OR = 0.47, 95% CI: 0.29–0.76,  $P = 0.002$  and AA vs. GA/GG: adjusted OR = 0.50, 95% CI: 0.31–0.81,  $P = 0.005$ ; Table 3). In addition, these associations were still significant after a Bonferroni correction for multiple comparisons.

**Table 1: Distribution of selected demographic variables and risk factors in EGJA cases and controls**

| Variable       | Overall Cases (n=1,063) | Overall Controls (n=1,677) | P <sup>a</sup> |
|----------------|-------------------------|----------------------------|----------------|
|                | n (%)                   | n (%)                      |                |
| Age (years)    | 64.19 ±8.63             | 63.91 ±10.22               | 0.451          |
| Age (years)    |                         |                            | 0.165          |
| < 64           | 494 (46.47)             | 825 (49.19)                |                |
| ≥64            | 569 (53.53)             | 852 (50.81)                |                |
| Sex            |                         |                            | 0.909          |
| Male           | 759 (71.40)             | 1194 (71.20)               |                |
| Female         | 304 (28.60)             | 483 (28.80)                |                |
| Smoking status |                         |                            | <0.001         |
| Never          | 773 (72.72)             | 1323 (78.89)               |                |
| Ever           | 290 (27.28)             | 354 (21.11)                |                |
| Alcohol use    |                         |                            | <0.001         |
| Never          | 908 (85.42)             | 1507 (89.86)               |                |
| Ever           | 155 (14.58)             | 170 (10.14)                |                |

<sup>a</sup> Two-sided  $\chi^2$  test and Student *t* test.

**Table 2: Primary information for *MTHFR* polymorphisms (rs1801133 G>A, rs3753584 T>C, rs4845882 G>A, rs4846048 A>G and rs9651118 T>C)**

| Genotyped SNPs                                    | rs1801133 G>A | rs3753584 T>C | rs4845882 G>A | rs4846048 A>G | rs9651118 T>C |
|---------------------------------------------------|---------------|---------------|---------------|---------------|---------------|
| Chromosome                                        | 1             | 1             | 1             | 1             | 1             |
| Function                                          | Missense      | NearGene-5    | Intron        | Intron        | Intron        |
| Chr Pos (Genome Build 36.3)                       | 11778965      | 11787173      | 11765754      | 11768839      | 11784801      |
| MAF <sup>a</sup> for Chinese in database          | 0.439         | 0.093         | 0.198         | 0.105         | 0.382         |
| MAF in our controls (n = 1,677)                   | 0.359         | 0.108         | 0.209         | 0.096         | 0.378         |
| P value for HWE <sup>b</sup> test in our controls | 0.679         | 0.691         | 0.972         | 0.014         | 0.270         |
| Genotyping method                                 | SNPscan       | SNPscan       | SNPscan       | SNPscan       | SNPscan       |
| % Genotyping value                                | 99.01%        | 99.09%        | 99.05%        | 99.09%        | 98.98%        |

<sup>a</sup>MAF: minor allele frequency.

<sup>b</sup>HWE: Hardy–Weinberg equilibrium.

### Association of *MTHFR* rs1801133 G>A, rs3753584 T>C, rs4845882 G>A, rs4846048 A>G and rs9651118 T>C polymorphisms with EGJA in Different Stratification Groups

In the stratified analyses by sex, age, drinking and smoking, the genotype frequencies of *MTHFR* rs1801133 G>A polymorphism are listed in Table 4. After adjustment by logistic regression analysis, the association of *MTHFR* rs1801133 G>A variants with EGJA risk was evident in some subgroups [male group: AA vs. GG: adjusted OR = 1.66, 95% CI 1.26–2.20, *P* < 0.001, GA/AA vs. GG:

adjusted OR = 1.27, 95% CI 1.05–1.53, *P* = 0.015 and AA vs. GA/GG: adjusted OR = 1.61, 95% CI 1.24–2.08, *P* < 0.001; <64 years subgroup: AA vs. GG: adjusted OR = 1.51, 95% CI 1.06–2.14, *P* = 0.022, GA/AA vs. GG: adjusted OR = 1.38, 95% CI 1.09–1.74, *P* = 0.007 and AA vs. GA/GG: adjusted OR = 1.39, 95% CI 1.00–1.92, *P* = 0.049; ≥64 years subgroup: AA vs. GG: adjusted OR = 1.42, 95% CI 1.03–1.95, *P* = 0.032 and AA vs. GA/GG: adjusted OR = 1.47, 95% CI 1.10–1.96, *P* = 0.010; never smoking group: AA vs. GG: adjusted OR = 1.43, 95% CI 1.08–1.87, *P* = 0.012, GA/AA vs. GG: adjusted OR = 1.32, 95% CI 1.10–1.59, *P* = 0.004 and AA vs. GA/GG:

**Table 3: Logistic regression analyses of associations between *MTHFR* rs1801133 G>A, rs3753584 T>C, rs4845882 G>A, rs4846048 A>G and rs9651118 T>C polymorphisms and the risk of EGJA**

| Genotype                   | Cases<br>(n=1,063) |       | Controls<br>(n=1,677) |       | Crude OR<br>(95%CI)     | P            | Adjusted OR <sup>a</sup><br>(95%CI) | P            |
|----------------------------|--------------------|-------|-----------------------|-------|-------------------------|--------------|-------------------------------------|--------------|
|                            | n                  | %     | n                     | %     |                         |              |                                     |              |
| <i>MTHFR</i> rs1801133 G>A |                    |       |                       |       |                         |              |                                     |              |
| GG                         | 367                | 35.29 | 683                   | 40.82 | 1.00                    |              | 1.00                                |              |
| GA                         | 492                | 47.31 | 778                   | 46.50 | 1.11 (0.94-1.32)        | 0.208        | 1.10 (0.93-1.30)                    | 0.263        |
| AA                         | 181                | 17.40 | 212                   | 12.67 | <b>1.50 (1.19-1.90)</b> | <b>0.001</b> | <b>1.47 (1.16-1.86)</b>             | <b>0.001</b> |
| GA + AA                    | 673                | 64.71 | 990                   | 59.18 | <b>1.27 (1.08-1.49)</b> | <b>0.004</b> | <b>1.25 (1.06-1.47)</b>             | <b>0.007</b> |
| GG+ GA                     | 859                | 82.60 | 1,461                 | 87.33 | 1.00                    |              | 1.00                                |              |
| AA                         | 181                | 17.40 | 212                   | 12.67 | <b>1.45 (1.17-1.80)</b> | <b>0.001</b> | <b>1.43 (1.15-1.77)</b>             | <b>0.001</b> |
| A allele                   | 854                | 41.06 | 1,202                 | 35.92 |                         |              |                                     |              |
| <i>MTHFR</i> rs3753584 T>C |                    |       |                       |       |                         |              |                                     |              |
| TT                         | 855                | 82.13 | 1,330                 | 79.45 | 1.00                    |              | 1.00                                |              |
| CT                         | 177                | 17.00 | 326                   | 19.47 | 0.83 (0.67-1.01)        | 0.062        | 0.83 (0.68-1.01)                    | 0.067        |
| CC                         | 9                  | 0.86  | 18                    | 1.08  | 0.76 (0.34-1.70)        | 0.504        | 0.73 (0.32-1.63)                    | 0.440        |
| CT+CC                      | 186                | 17.87 | 344                   | 20.55 | 0.84 (0.69-1.03)        | 0.087        | 0.84 (0.69-1.03)                    | 0.091        |
| TT+CT                      | 1032               | 99.14 | 1,656                 | 98.92 | 1.00                    |              | 1.00                                |              |
| CC                         | 9                  | 0.86  | 18                    | 1.08  | 0.80 (0.36-1.79)        | 0.591        | 0.77 (0.34-1.72)                    | 0.516        |
| C allele                   | 195                | 9.37  | 362                   | 10.81 |                         |              |                                     |              |
| <i>MTHFR</i> rs4845882 G>A |                    |       |                       |       |                         |              |                                     |              |
| GG                         | 687                | 66.06 | 1,049                 | 62.66 | 1.00                    |              | 1.00                                |              |
| GA                         | 330                | 31.73 | 552                   | 32.97 | 0.89 (0.75-1.05)        | 0.153        | 0.89 (0.75-1.05)                    | 0.150        |
| AA                         | 23                 | 2.21  | 73                    | 4.36  | <b>0.47 (0.29-0.75)</b> | <b>0.002</b> | <b>0.47 (0.29-0.76)</b>             | <b>0.002</b> |
| GA+AA                      | 353                | 33.94 | 625                   | 37.34 | 0.86 (0.73-1.01)        | 0.074        | 0.86 (0.73-1.02)                    | 0.075        |
| GG+GA                      | 1,017              | 97.79 | 1,601                 | 95.64 | 1.00                    |              | 1.00                                |              |
| AA                         | 23                 | 2.21  | 73                    | 4.36  | <b>0.50 (0.31-0.80)</b> | <b>0.004</b> | <b>0.50 (0.31-0.81)</b>             | <b>0.005</b> |
| A allele                   | 376                | 18.08 | 698                   | 20.85 |                         |              |                                     |              |
| <i>MTHFR</i> rs4846048 A>G |                    |       |                       |       |                         |              |                                     |              |
| AA                         | 860                | 82.61 | 1,378                 | 82.32 | 1.00                    |              | 1.00                                |              |
| AG                         | 171                | 16.43 | 272                   | 16.25 | 0.98 (0.80-1.21)        | 0.883        | 0.99 (0.80-1.22)                    | 0.921        |
| GG                         | 10                 | 0.96  | 24                    | 1.43  | 0.65 (0.31-1.37)        | 0.260        | 0.63 (0.30-1.34)                    | 0.230        |
| AG+GG                      | 181                | 17.39 | 296                   | 17.68 | 0.98 (0.80-1.20)        | 0.845        | 0.98 (0.80-1.21)                    | 0.870        |
| AA+AG                      | 1,031              | 99.04 | 1,650                 | 98.57 | 1.00                    |              | 1.00                                |              |
| GG                         | 10                 | 0.96  | 24                    | 1.43  | 0.67 (0.32-1.40)        | 0.284        | 0.65 (0.31-1.36)                    | 0.250        |
| G allele                   | 191                | 9.17  | 320                   | 9.56  |                         |              |                                     |              |
| <i>MTHFR</i> rs9651118 T>C |                    |       |                       |       |                         |              |                                     |              |
| TT                         | 423                | 40.75 | 638                   | 38.11 | 1.00                    |              | 1.00                                |              |
| TC                         | 486                | 46.82 | 808                   | 48.27 | 0.86 (0.73-1.02)        | 0.075        | 0.87 (0.74-1.03)                    | 0.105        |

(Continued)

| Genotype | Cases<br>(n=1,063) |       | Controls<br>(n=1,677) |       | Crude OR<br>(95%CI) | P     | Adjusted OR <sup>a</sup><br>(95%CI) | P     |
|----------|--------------------|-------|-----------------------|-------|---------------------|-------|-------------------------------------|-------|
|          | n                  | %     | n                     | %     |                     |       |                                     |       |
| CC       | 129                | 12.43 | 228                   | 13.62 | 0.81 (0.63-1.04)    | 0.094 | 0.83 (0.65-1.07)                    | 0.150 |
| TC+CC    | 615                | 59.25 | 1,036                 | 61.89 | 0.90 (0.76-1.05)    | 0.171 | 0.91 (0.78-1.07)                    | 0.260 |
| TT+TC    | 909                | 87.57 | 1,446                 | 86.38 | 1.00                |       | 1.00                                |       |
| CC       | 129                | 12.43 | 228                   | 13.62 | 0.90 (0.71-1.13)    | 0.372 | 0.92 (0.73-1.16)                    | 0.489 |
| C allele | 744                | 35.84 | 1,264                 | 37.75 |                     |       |                                     |       |

<sup>a</sup> Adjusted for age, sex, smoking and drinking status; Bold values are statistically significant ( $P < 0.05$ ).

**Table 4: Stratified analyses between *MTHFR* rs1801133 G>A polymorphism and EGJA risk by sex, age, smoking status and alcohol consumption**

| Variable            | <i>MTHFR</i> rs1801133 G>A<br>(case/control) <sup>a</sup> |         |         | Adjusted OR <sup>b</sup> (95% CI); P |                                       |                                                |                                              |                                                |
|---------------------|-----------------------------------------------------------|---------|---------|--------------------------------------|---------------------------------------|------------------------------------------------|----------------------------------------------|------------------------------------------------|
|                     | GG                                                        | GA      | AA      | GG                                   | GA                                    | AA                                             | GA/AA                                        | AA vs. (GA/GG)                                 |
| Sex                 |                                                           |         |         |                                      |                                       |                                                |                                              |                                                |
| Male                | 260/485                                                   | 350/563 | 135/142 | 1.00                                 | 1.10 (0.90-1.34);<br><i>P</i> : 0.360 | <b>1.66 (1.26-2.20);</b><br><i>P</i> : < 0.001 | <b>1.27 (1.05-1.53);</b><br><i>P</i> : 0.015 | <b>1.61 (1.24-2.08);</b><br><i>P</i> : < 0.001 |
| Female              | 107/198                                                   | 142/215 | 46/70   | 1.00                                 | 1.10 (0.80-1.50);<br><i>P</i> : 0.575 | 1.03 (0.66-1.60);<br><i>P</i> : 0.909          | 1.17 (0.86-1.59);<br><i>P</i> : 0.311        | 1.01 (0.67-1.53);<br><i>P</i> : 0.954          |
| Age                 |                                                           |         |         |                                      |                                       |                                                |                                              |                                                |
| <64                 | 173/362                                                   | 233/363 | 76/98   | 1.00                                 | 1.24 (0.97-1.58);<br><i>P</i> : 0.089 | <b>1.51 (1.06-2.14);</b><br><i>P</i> : 0.022   | <b>1.38 (1.09-1.74);</b><br><i>P</i> : 0.007 | <b>1.39 (1.00-1.92);</b><br><i>P</i> : 0.049   |
| ≥64                 | 194/321                                                   | 259/415 | 105/114 | 1.00                                 | 0.97 (0.77-1.23);<br><i>P</i> : 0.822 | <b>1.42 (1.03-1.95);</b><br><i>P</i> : 0.032   | 1.12 (0.90-1.40);<br><i>P</i> : 0.312        | <b>1.47 (1.10-1.96);</b><br><i>P</i> : 0.010   |
| Smoking status      |                                                           |         |         |                                      |                                       |                                                |                                              |                                                |
| Never               | 263/549                                                   | 368/603 | 123/168 | 1.00                                 | 1.19 (0.98-1.44);<br><i>P</i> : 0.085 | <b>1.43 (1.08-1.87);</b><br><i>P</i> : 0.012   | <b>1.32 (1.10-1.59);</b><br><i>P</i> : 0.004 | <b>1.33 (1.04-1.72);</b><br><i>P</i> : 0.026   |
| Ever                | 104/134                                                   | 124/175 | 58/44   | 1.00                                 | 0.86 (0.61-1.22);<br><i>P</i> : 0.396 | <b>1.62 (1.01-2.61);</b><br><i>P</i> : 0.046   | 1.04 (0.75-1.45);<br><i>P</i> : 0.805        | <b>1.79 (1.15-2.76);</b><br><i>P</i> : 0.009   |
| Alcohol consumption |                                                           |         |         |                                      |                                       |                                                |                                              |                                                |
| Never               | 308/631                                                   | 426/686 | 152/187 | 1.00                                 | 1.19 (0.99-1.42);<br><i>P</i> : 0.065 | <b>1.54 (1.20-1.98);</b><br><i>P</i> : 0.001   | <b>1.35 (1.13-1.60);</b><br><i>P</i> : 0.001 | <b>1.45 (1.15-1.82);</b><br><i>P</i> : 0.002   |
| Ever                | 59/52                                                     | 66/92   | 29/25   | 1.00                                 | 0.60 (0.36-1.00);<br><i>P</i> : 0.051 | 1.10 (0.56-2.19);<br><i>P</i> : 0.780          | 0.70 (0.43-1.13);<br><i>P</i> : 0.138        | 1.47 (0.80-2.73);<br><i>P</i> : 0.217          |

<sup>a</sup> The genotyping was successful in 1063 (97.84%) EGJA cases, and 1677 (99.76%) controls for *MTHFR* rs1801133 G>A;

<sup>b</sup> Adjusted for age, sex, smoking status and alcohol consumption (besides stratified factors accordingly) in a logistic regression model;

adjusted OR = 1.33, 95% CI 1.04–1.72,  $P = 0.026$ ; ever smoking group: AA vs. GG: adjusted OR = 1.62, 95% CI 1.01–2.61,  $P = 0.046$  and AA vs. GA/GG: adjusted OR = 1.79, 95% CI 1.15–2.76,  $P = 0.009$  and never drinking group: AA vs. GG: adjusted OR = 1.54, 95% CI 1.20–1.98,

$P = 0.001$ , GA/AA vs. GG: adjusted OR = 1.35, 95% CI 1.13–1.60,  $P = 0.001$  and AA vs. GA/GG: adjusted OR = 1.45, 95% CI 1.15–1.82,  $P = 0.002$ ; Table 4)].

Table 5 summarizes the results of association between *MTHFR* rs3753584 T>C polymorphism and

**Table 5: Stratified analyses between *MTHFR* rs3753584 T>C polymorphism and EGJA risk by sex, age, smoking status and alcohol consumption**

| Variable            | <i>MTHFR</i> rs3753584 T>C (case/control) <sup>a</sup> |         |      | Adjusted OR <sup>b</sup> (95% CI); <i>P</i> |                                                    |                                       |                                                    |                                       |
|---------------------|--------------------------------------------------------|---------|------|---------------------------------------------|----------------------------------------------------|---------------------------------------|----------------------------------------------------|---------------------------------------|
|                     | TT                                                     | TC      | CC   | TT                                          | TC                                                 | CC                                    | TC / CC                                            | CC vs. (TC/TT)                        |
| Sex                 |                                                        |         |      |                                             |                                                    |                                       |                                                    |                                       |
| Male                | 613/950                                                | 126/226 | 7/15 | 1.00                                        | 0.85 (0.67-1.08);<br><i>P</i> : 0.177              | 0.69 (0.28-1.70);<br><i>P</i> : 0.415 | 0.85 (0.67-1.08);<br><i>P</i> : 0.184              | 0.72 (0.29-1.78);<br><i>P</i> : 0.471 |
| Female              | 242/380                                                | 51/100  | 2/3  | 1.00                                        | 0.80 (0.55-1.17);<br><i>P</i> : 0.252              | 0.61 (0.08-4.43);<br><i>P</i> : 0.622 | 0.83 (0.57-1.20);<br><i>P</i> : 0.319              | 0.64 (0.09-4.72);<br><i>P</i> : 0.663 |
| Age                 |                                                        |         |      |                                             |                                                    |                                       |                                                    |                                       |
| <64                 | 398/640                                                | 79/177  | 5/7  | 1.00                                        | <b>0.70 (0.52-0.93);</b><br><b><i>P</i>: 0.016</b> | 0.99 (0.31-3.19);<br><i>P</i> : 0.987 | <b>0.73 (0.55-0.97);</b><br><b><i>P</i>: 0.032</b> | 1.08 (0.34-3.47);<br><i>P</i> : 0.899 |
| ≥64                 | 457/691                                                | 98/149  | 4/11 | 1.00                                        | 0.98 (0.74-1.30);<br><i>P</i> : 0.881              | 0.53 (0.17-1.68);<br><i>P</i> : 0.282 | 0.97 (0.73-1.28);<br><i>P</i> : 0.813              | 0.54 (0.17-1.71);<br><i>P</i> : 0.296 |
| Smoking status      |                                                        |         |      |                                             |                                                    |                                       |                                                    |                                       |
| Never               | 619/1,058                                              | 131/249 | 4/14 | 1.00                                        | 0.88 (0.70-1.11);<br><i>P</i> : 0.283              | 0.47 (0.16-1.45);<br><i>P</i> : 0.189 | 0.88 (0.70-1.11);<br><i>P</i> : 0.288              | 0.49 (0.16-1.51);<br><i>P</i> : 0.216 |
| Ever                | 236/272                                                | 46/77   | 5/4  | 1.00                                        | 0.74 (0.49-1.11);<br><i>P</i> : 0.144              | 1.22 (0.31-4.74);<br><i>P</i> : 0.776 | 0.77 (0.52-1.15);<br><i>P</i> : 0.202              | 1.29 (0.33-5.04);<br><i>P</i> : 0.711 |
| Alcohol consumption |                                                        |         |      |                                             |                                                    |                                       |                                                    |                                       |
| Never               | 729/1,190                                              | 152/299 | 6/16 | 1.00                                        | 0.81 (0.65-1.00);<br><i>P</i> : 0.052              | 0.59 (0.23-1.52);<br><i>P</i> : 0.273 | 0.82 (0.66-1.01);<br><i>P</i> : 0.064              | 0.63 (0.24-1.61);<br><i>P</i> : 0.331 |
| Ever                | 126/140                                                | 25/27   | 3/2  | 1.00                                        | 1.11 (0.60-2.06);<br><i>P</i> : 0.748              | 1.52 (0.24-9.63);<br><i>P</i> : 0.657 | 1.14 (0.63-2.07);<br><i>P</i> : 0.668              | 1.49 (0.24-9.44);<br><i>P</i> : 0.669 |

<sup>a</sup> The genotyping was successful in 1063 (97.93%) EGJA cases, and 1677 (99.82%) controls for *MTHFR* rs3753584 T>C;

<sup>b</sup> Adjusted for age, sex, smoking status and alcohol consumption (besides stratified factors accordingly) in a logistic regression model;

EGJA risk in the stratified analysis. We found that *MTHFR* rs3753584 T>C polymorphism was associated with the decreased risk of EGJA in <64 years subgroup [TC vs. TT: adjusted OR = 0.70, 95% CI 0.52–0.93, *P* = 0.016 and TC/CC vs. TT: adjusted OR = 0.73, 95% CI 0.55–0.97, *P* = 0.032 (Table 5)].

The results of association between *MTHFR* rs4845882 G>A polymorphism and EGJA risk in the stratified analyses are summarized in Table 6. We found that *MTHFR* rs4845882 G>A polymorphism decreased the risk of EGJA in several subgroups [male group: AA vs. GG: adjusted OR = 0.47, 95% CI 0.27–0.83, *P* = 0.009 and AA vs. GA/GG: adjusted OR = 0.50, 95% CI 0.29–0.87, *P* = 0.014; <64 years subgroup: AA vs. GG: adjusted OR = 0.41, 95% CI 0.20–0.84, *P* = 0.015 and AA vs. GA/GG: adjusted OR = 0.45, 95% CI 0.22–0.91, *P* = 0.027; never smoking group: AA vs. GG: adjusted OR = 0.37, 95% CI 0.21–0.67, *P* = 0.001 and AA vs.

GA/GG: adjusted OR = 0.39, 95% CI 0.22–0.70, *P* = 0.002 and never drinking group: AA vs. GG: adjusted OR = 0.44, 95% CI 0.26–0.74, *P* = 0.002, GA/AA vs. GG: adjusted OR = 0.83, 95% CI 0.69–0.98, *P* = 0.032 and AA vs. GA/GG: adjusted OR = 0.48, 95% CI 0.29–0.80, *P* = 0.005 (Table 6)].

Table 7 lists *MTHFR* rs4846048 A>G genotype frequencies in the stratified analysis. We found no significant difference in genotype distribution of *MTHFR* rs4846048 A>G polymorphism among EGJA cases and non-cancer controls.

The results of relationship between *MTHFR* rs9651118 T>C polymorphism and EGJA risk in the stratified analyses are summarized in Table 8. We found that *MTHFR* rs9651118 T>C polymorphism was associated with the decreased risk of EGJA in <64 years subgroup [TC vs. TT: adjusted OR = 0.78, 95% CI 0.61–0.99, *P* = 0.040 (Table 8)].

**Table 6: Stratified analyses between *MTHFR* rs4845882 G>A polymorphism and EGJA risk by sex, age, smoking status and alcohol consumption**

| Variable            | <i>MTHFR</i> rs4845882 G>A (case/control) <sup>a</sup> |         |       | Adjusted OR <sup>b</sup> (95% CI); <i>P</i> |                                       |                                                     |                                                     |                                                     |
|---------------------|--------------------------------------------------------|---------|-------|---------------------------------------------|---------------------------------------|-----------------------------------------------------|-----------------------------------------------------|-----------------------------------------------------|
|                     | GG                                                     | GA      | AA    | GG                                          | GA                                    | AA                                                  | GA/AA                                               | AA vs. (GA/GG)                                      |
| Sex                 |                                                        |         |       |                                             |                                       |                                                     |                                                     |                                                     |
| Male                | 492/746                                                | 237/391 | 17/54 | 1.00                                        | 0.89 (0.73-1.09);<br><i>P</i> : 0.268 | <b>0.47 (0.27-0.83);</b><br><i>P</i> : <b>0.009</b> | 0.86 (0.71-1.05);<br><i>P</i> : 0.113               | <b>0.50 (0.29-0.87);</b><br><i>P</i> : <b>0.014</b> |
| Female              | 195/303                                                | 93/161  | 6/19  | 1.00                                        | 0.86 (0.63-1.18);<br><i>P</i> : 0.354 | 0.43 (0.16-1.12);<br><i>P</i> : 0.084               | 0.86 (0.63-1.17);<br><i>P</i> : 0.330               | 0.46 (0.18-1.21);<br><i>P</i> : 0.117               |
| Age                 |                                                        |         |       |                                             |                                       |                                                     |                                                     |                                                     |
| <64                 | 320/507                                                | 152/279 | 10/37 | 1.00                                        | 0.83 (0.65-1.06);<br><i>P</i> : 0.132 | <b>0.41 (0.20-0.84);</b><br><i>P</i> : <b>0.015</b> | 0.81 (0.64-1.02);<br><i>P</i> : 0.077               | <b>0.45 (0.22-0.91);</b><br><i>P</i> : <b>0.027</b> |
| ≥64                 | 367/542                                                | 178/273 | 13/36 | 1.00                                        | 0.94 (0.74-1.18);<br><i>P</i> : 0.566 | 0.53 (0.28-1.01);<br><i>P</i> : 0.052               | 0.91 (0.73-1.14);<br><i>P</i> : 0.424               | 0.55 (0.29-1.04);<br><i>P</i> : 0.068               |
| Smoking status      |                                                        |         |       |                                             |                                       |                                                     |                                                     |                                                     |
| Never               | 496/832                                                | 243/427 | 14/62 | 1.00                                        | 0.92 (0.76-1.12);<br><i>P</i> : 0.416 | <b>0.37 (0.21-0.67);</b><br><i>P</i> : <b>0.001</b> | 0.89 (0.73-1.07);<br><i>P</i> : 0.207               | <b>0.39 (0.22-0.70);</b><br><i>P</i> : <b>0.002</b> |
| Ever                | 191/217                                                | 87/125  | 9/11  | 1.00                                        | 0.81 (0.58-1.14);<br><i>P</i> : 0.220 | 0.96 (0.38-2.40);<br><i>P</i> : 0.927               | 0.83 (0.60-1.16);<br><i>P</i> : 0.269               | 1.04 (0.42-2.59);<br><i>P</i> : 0.939               |
| Alcohol consumption |                                                        |         |       |                                             |                                       |                                                     |                                                     |                                                     |
| Never               | 591/938                                                | 276/501 | 19/66 | 1.00                                        | 0.85 (0.71-1.01);<br><i>P</i> : 0.065 | <b>0.44 (0.26-0.74);</b><br><i>P</i> : <b>0.002</b> | <b>0.83 (0.69-0.98);</b><br><i>P</i> : <b>0.032</b> | <b>0.48 (0.29-0.80);</b><br><i>P</i> : <b>0.005</b> |
| Ever                | 96/111                                                 | 54/51   | 4/7   | 1.00                                        | 1.30 (0.80-2.12);<br><i>P</i> : 0.293 | 0.85 (0.23-3.19);<br><i>P</i> : 0.813               | 1.25 (0.78-2.02);<br><i>P</i> : 0.355               | 0.78 (0.21-2.87);<br><i>P</i> : 0.708               |

<sup>a</sup> The genotyping was successful in 1063 (97.84%) EGJA cases, and 1677 (99.82%) controls for *MTHFR* rs4845882 G>A;

<sup>b</sup> Adjusted for age, sex, smoking status and alcohol consumption (besides stratified factors accordingly) in a logistic regression model;

## SNP haplotypes

We used a SHESIS software (<http://analysis.bio-x.cn/myAnalysis.php>) [17] to construct haplotypes of *MTHFR* gene (Table 9). Finally, five *MTHFR* haplotypes were identified. When *MTHFR* A<sub>rs1801133</sub>T<sub>rs3753584</sub>G<sub>rs4845882</sub>A<sub>rs4846048</sub>T<sub>rs9651118</sub> haplotype was used as reference, we found that *MTHFR* G<sub>rs1801133</sub>T<sub>rs3753584</sub>G<sub>rs4845882</sub>A<sub>rs4846048</sub>C<sub>rs9651118</sub> G<sub>rs1801133</sub>C<sub>rs3753584</sub>A<sub>rs4845882</sub>A<sub>rs4846048</sub>T<sub>rs9651118</sub> and G<sub>rs1801133</sub>T<sub>rs3753584</sub>A<sub>rs4845882</sub>G<sub>rs4846048</sub>T<sub>rs9651118</sub> haplotypes significantly decreased the risk of EGJA (*P* = 0.002, *P* < 0.001 and *P* = 0.038, respectively, Table 9).

## DISCUSSION

Incidence of EGJA has increased over the past two decades [18, 19]. Many studies demonstrated that the morbidity of EGJA was increased in Asian countries, such

as China, Korea and Japan [19–21]. However, the etiology of EGJA remains unknown. In this study, we explored the association between *MTHFR* rs1801133 G>A, rs3753584 T>C, rs4845882 G>A, rs4846048 A>G and rs9651118 T>C polymorphisms and EGJA risk in Eastern Chinese Han population. We found that *MTHFR* rs1801133 G>A might be associated with the increased risk of EGJA. Meanwhile, *MTHFR* rs3753584 T>C, rs4845882 G>A and rs9651118 T>C polymorphisms decreased the risk of EGJA.

*MTHFR* gene lies in 1p36.3 and contains 11 exons with a length of about 1980 bp. In exon 4, a G to A variant at nucleotide 677 locus (rs1801133 G>A) directly leads to valine substitution for alanine, which is relevant to a reduction of *MTHFR* activity [22]. The individuals who carry heterozygous genotype (GA genotype) of *MTHFR* rs1801133 G>A polymorphism have 70% of normal enzyme activity, however, those who carry homozygous

**Table 7: Stratified analyses between *MTHFR* rs4846048 A>G polymorphism and EGJA risk by sex, age, smoking status and alcohol consumption**

| Variable            | <i>MTHFR</i> rs4846048 A>G (case/control) <sup>a</sup> |         |      | Adjusted OR <sup>b</sup> (95% CI); <i>P</i> |                                       |                                       |                                       |                                       |
|---------------------|--------------------------------------------------------|---------|------|---------------------------------------------|---------------------------------------|---------------------------------------|---------------------------------------|---------------------------------------|
|                     | AA                                                     | AG      | GG   | AA                                          | AG                                    | GG                                    | AG/GG                                 | GG vs. (AG/AA)                        |
| Sex                 |                                                        |         |      |                                             |                                       |                                       |                                       |                                       |
| Male                | 615/984                                                | 124/189 | 7/18 | 1.00                                        | 1.04 (0.81-1.33);<br><i>P</i> : 0.772 | 0.58 (0.24-1.40);<br><i>P</i> : 0.227 | 1.02 (0.80-1.29);<br><i>P</i> : 0.904 | 0.58 (0.24-1.41);<br><i>P</i> : 0.233 |
| Female              | 245/394                                                | 47/83   | 3/6  | 1.00                                        | 0.88 (0.59-1.30);<br><i>P</i> : 0.522 | 0.73 (0.18-2.96);<br><i>P</i> : 0.659 | 0.90 (0.61-1.32);<br><i>P</i> : 0.597 | 0.77 (0.19-3.11);<br><i>P</i> : 0.711 |
| Age                 |                                                        |         |      |                                             |                                       |                                       |                                       |                                       |
| <64                 | 398/677                                                | 78/134  | 6/12 | 1.00                                        | 0.99 (0.73-1.34);<br><i>P</i> : 0.927 | 0.74 (0.27-2.02);<br><i>P</i> : 0.562 | 0.99 (0.74-1.34);<br><i>P</i> : 0.955 | 0.76 (0.28-2.07);<br><i>P</i> : 0.590 |
| ≥64                 | 462/701                                                | 93/138  | 4/12 | 1.00                                        | 1.00 (0.75-1.33);<br><i>P</i> : 0.981 | 0.48 (0.15-1.51);<br><i>P</i> : 0.210 | 0.97 (0.74-1.29);<br><i>P</i> : 0.855 | 0.49 (0.16-1.53);<br><i>P</i> : 0.221 |
| Smoking status      |                                                        |         |      |                                             |                                       |                                       |                                       |                                       |
| Never               | 624/1,081                                              | 125/220 | 5/20 | 1.00                                        | 0.96 (0.75-1.22);<br><i>P</i> : 0.725 | 0.43 (0.16-1.16);<br><i>P</i> : 0.095 | 0.94 (0.74-1.19);<br><i>P</i> : 0.611 | 0.45 (0.17-1.19);<br><i>P</i> : 0.107 |
| Ever                | 236/297                                                | 46/52   | 5/4  | 1.00                                        | 1.13 (0.73-1.75);<br><i>P</i> : 0.582 | 1.49 (0.39-5.72);<br><i>P</i> : 0.563 | 1.17 (0.77-1.78);<br><i>P</i> : 0.473 | 1.47 (0.38-5.66);<br><i>P</i> : 0.572 |
| Alcohol consumption |                                                        |         |      |                                             |                                       |                                       |                                       |                                       |
| Never               | 736/1,236                                              | 145/248 | 6/21 | 1.00                                        | 0.96 (0.77-1.20);<br><i>P</i> : 0.709 | 0.47 (0.19-1.16);<br><i>P</i> : 0.101 | 0.95 (0.76-1.18);<br><i>P</i> : 0.613 | 0.48 (0.19-1.19);<br><i>P</i> : 0.115 |
| Ever                | 124/142                                                | 26/24   | 4/3  | 1.00                                        | 1.31 (0.70-2.46);<br><i>P</i> : 0.406 | 1.77 (0.36-8.68);<br><i>P</i> : 0.483 | 1.35 (0.74-2.46);<br><i>P</i> : 0.323 | 1.70 (0.35-8.32);<br><i>P</i> : 0.512 |

<sup>a</sup> The genotyping was successful in 1063 (97.93%) EGJA cases, and 1677 (99.82%) controls for *MTHFR* rs4846048 A>G;

<sup>b</sup> Adjusted for age, sex, smoking status and alcohol consumption (besides stratified factors accordingly) in a logistic regression model;

genotype (AA genotype) have only 30% of normal enzyme activity [23]. A case-control study reported that rs1801133 AA genotype was associated an increased risk of GCA [24]. Another case-control study also found that *MTHFR* rs1801133 AA and GA genotypes were associated the increased risk of GCA [25]. These results were in accordance with our conclusions. In the future, more replicated study should be conducted to verify these primary findings.

*MTHFR* rs3753584 T>C is situated in the intron region of *MTHFR* gene. There were only a few studies focusing on the association between *MTHFR* rs3753584 T>C and cancer risk. A previous study found that there was an increased lung cancer risk in carriers of *MTHFR* rs3753584 CC genotype compared with carriers of rs3753584 TT genotype [26]. However, no association was found between ESCC risk and *MTHFR* rs3753584 T>C polymorphism [11]. In addition, Wang *et al.* also reported

that *MTHFR* rs3753584 T>C was not associated with GCA risk [12]. The present study concluded that rs3753584 TC and TC/CC genotypes were related to a decreased EGJA risk in <64 years subgroup. These apparent discrepancy findings may be due to the insufficient sample size. In the future, more studies with large sample size and detailed environmental factors are indispensable to explore the relationship between *MTHFR* rs3753584 T>C and the risk of different cancers.

*MTHFR* rs4845882 G>A polymorphism lies in a intron region and is almost complete linkage disequilibrium (LD) with *MTHFR* rs1801131 A>C locus. Shen *et al.* found there was no significant relationship between *MTHFR* rs4845882 G>A polymorphism and gastric cancer risk [27]. Additionally, the association between *MTHFR* rs4845882 G>A and GCA risk was not concluded in a recent study [12]. However, our study saw a decreased EGJA risk in the individuals carrying



**Table 8: Stratified analyses between *MTHFR* rs9651118 T>C polymorphism and EGJA risk by sex, age, smoking status and alcohol consumption**

| Variable            | <i>MTHFR</i> rs9651118 T>C<br>(case/control) <sup>a</sup> |         |         | Adjusted OR <sup>b</sup> (95% CI); <i>P</i> |                                                    |                                       |                                       |                                       |
|---------------------|-----------------------------------------------------------|---------|---------|---------------------------------------------|----------------------------------------------------|---------------------------------------|---------------------------------------|---------------------------------------|
|                     | TT                                                        | TC      | CC      | TT                                          | TC                                                 | CC                                    | TC / CC                               | CC vs. (TC/TT)                        |
| Sex                 |                                                           |         |         |                                             |                                                    |                                       |                                       |                                       |
| Male                | 309/447                                                   | 339/574 | 95/170  | 1.00                                        | 0.82 (0.68-1.00);<br><i>P</i> : 0.054              | 0.80 (0.60-1.07);<br><i>P</i> : 0.134 | 0.86 (0.71-1.04);<br><i>P</i> : 0.109 | 0.91 (0.69-1.19);<br><i>P</i> : 0.492 |
| Female              | 114/191                                                   | 147/234 | 34/58   | 1.00                                        | 1.03 (0.76-1.40);<br><i>P</i> : 0.857              | 0.99 (0.61-1.61);<br><i>P</i> : 0.970 | 1.11 (0.82-1.50);<br><i>P</i> : 0.501 | 1.01 (0.64-1.60);<br><i>P</i> : 0.956 |
| Age                 |                                                           |         |         |                                             |                                                    |                                       |                                       |                                       |
| <64                 | 190/288                                                   | 231/424 | 59/111  | 1.00                                        | <b>0.78 (0.61-0.99);</b><br><b><i>P</i>: 0.040</b> | 0.80 (0.55-1.15);<br><i>P</i> : 0.225 | 0.83 (0.66-1.05);<br><i>P</i> : 0.128 | 0.95 (0.68-1.34);<br><i>P</i> : 0.767 |
| ≥64                 | 233/350                                                   | 255/384 | 70/117  | 1.00                                        | 0.96 (0.76-1.21);<br><i>P</i> : 0.728              | 0.89 (0.63-1.25);<br><i>P</i> : 0.502 | 0.99 (0.80-1.23);<br><i>P</i> : 0.914 | 0.93 (0.68-1.28);<br><i>P</i> : 0.651 |
| Smoking status      |                                                           |         |         |                                             |                                                    |                                       |                                       |                                       |
| Never               | 299/499                                                   | 357/636 | 95/186  | 1.00                                        | 0.88 (0.73-1.06);<br><i>P</i> : 0.182              | 0.80 (0.60-1.06);<br><i>P</i> : 0.126 | 0.92 (0.77-1.11);<br><i>P</i> : 0.380 | 0.89 (0.68-1.16);<br><i>P</i> : 0.374 |
| Ever                | 124/140                                                   | 129/173 | 34/43   | 1.00                                        | 0.83 (0.59-1.16);<br><i>P</i> : 0.270              | 0.95 (0.56-1.59);<br><i>P</i> : 0.835 | 0.87 (0.63-1.19);<br><i>P</i> : 0.378 | 1.05 (0.64-1.72);<br><i>P</i> : 0.843 |
| Alcohol consumption |                                                           |         |         |                                             |                                                    |                                       |                                       |                                       |
| Never               | 357/564                                                   | 415/728 | 113/213 | 1.00                                        | 0.86 (0.72-1.03);<br><i>P</i> : 0.092              | 0.80 (0.62-1.04);<br><i>P</i> : 0.096 | 0.90 (0.76-1.06);<br><i>P</i> : 0.214 | 0.89 (0.70-1.14);<br><i>P</i> : 0.369 |
| Ever                | 66/74                                                     | 71/80   | 16/15   | 1.00                                        | 0.93 (0.57-1.49);<br><i>P</i> : 0.750              | 1.12 (0.50-2.51);<br><i>P</i> : 0.783 | 0.97 (0.61-1.54);<br><i>P</i> : 0.907 | 1.17 (0.54-2.53);<br><i>P</i> : 0.686 |

<sup>a</sup> The genotyping was successful in 1063 (97.65%) EGJA cases, and 1677 (99.82%) controls for *MTHFR* rs9651118 T>C;

<sup>b</sup> Adjusted for age, sex, smoking status and alcohol consumption (besides stratified factors accordingly) in a logistic regression model;

*MTHFR* rs4845882 AA genotype in male and <64 years subgroups. *MTHFR* rs9651118 T>C is situated in intron 2 and possesses low LD with rs1801133 G>A ( $r^2 < 0.30$ ). Functional annotation by HapReg demonstrated that *MTHFR* rs9651118 T>C coincides with *MTHFR* enhancers or promoters, which may correspond to the regions of open chromatin [28]. Several studies implicated that *MTHFR* rs9651118 C allele was associated with a reduced risk of lung cancer and prostate cancer [28, 29]. In addition, *MTHFR* rs9651118 C allele was associated with a decreased risk of breast cancer [30]. Our results suggested that *MTHFR* rs9651118 TC genotype may reduce EGJA susceptibility in <64 years subgroup, which were very similar to the findings of previous studies. In the future, these potential should be confirmed by functional studies.

In this case-control study, we constructed five *MTHFR* haplotypes to assess the potential inherited

patterns of haplotype. We found that *MTHFR* G<sub>rs1801133</sub>T<sub>rs3753584</sub>G<sub>rs4845882</sub>A<sub>rs4846048</sub>C<sub>rs9651118</sub>G<sub>rs1801133</sub>C<sub>rs3753584</sub>A<sub>rs4845882</sub>A<sub>rs4846048</sub>T<sub>rs9651118</sub> and G<sub>rs1801133</sub>T<sub>rs3753584</sub>A<sub>rs4845882</sub>G<sub>rs4846048</sub>T<sub>rs9651118</sub> haplotypes significantly decreased the risk of EGJA. To the best of our knowledge, we first explore the relationship of haplotypes in *MTHFR* rs1801133 G>A, rs3753584 T>C, rs4845882 G>A, rs4846048 A>G and rs9651118 T>C polymorphisms with EGJA susceptibility. We also found that *MTHFR* rs1801133 G and rs4845882 A alleles might be protective factors for haplotype to EGJA.

However, several limitations in our study should be presented. First, for the controls were recruited from the local hospitals, the selection bias of the study population should not be ignored. Second, the data of plasma folate level were not available, which may affect the association between *MTHFR* SNPs and EGJA susceptibility. Thirdly, for lack of cancer stage, disease progression and overall survival data, we did not consider the influence of *MTHFR*

**Table 9: *MTHFR* haplotype frequencies (%) in patients and controls and risk of esophagogastric junction adenocarcinoma**

| Haplotypes                                                                                                         | Case (n=2,126) |       | Control (n=3,354) |       | Crude OR (95% CI)       | P                |
|--------------------------------------------------------------------------------------------------------------------|----------------|-------|-------------------|-------|-------------------------|------------------|
|                                                                                                                    | n              | %     | n                 | %     |                         |                  |
| A <sub>rs1801133</sub> T <sub>rs3753584</sub> G <sub>rs4845882</sub> A <sub>rs4846048</sub> T <sub>rs9651118</sub> | 814            | 39.36 | 1169              | 34.92 | 1.00                    |                  |
| G <sub>rs1801133</sub> T <sub>rs3753584</sub> G <sub>rs4845882</sub> A <sub>rs4846048</sub> C <sub>rs9651118</sub> | 708            | 34.24 | 1244              | 37.16 | <b>0.82 (0.72-0.93)</b> | <b>0.002</b>     |
| G <sub>rs1801133</sub> C <sub>rs3753584</sub> A <sub>rs4845882</sub> A <sub>rs4846048</sub> T <sub>rs9651118</sub> | 171            | 8.27  | 335               | 10.01 | <b>0.69 (0.56-0.85)</b> | <b>&lt;0.001</b> |
| G <sub>rs1801133</sub> T <sub>rs3753584</sub> A <sub>rs4845882</sub> G <sub>rs4846048</sub> T <sub>rs9651118</sub> | 173            | 8.37  | 309               | 9.23  | <b>0.80 (0.65-0.99)</b> | <b>0.038</b>     |
| G <sub>rs1801133</sub> T <sub>rs3753584</sub> G <sub>rs4845882</sub> A <sub>rs4846048</sub> T <sub>rs9651118</sub> | 130            | 6.29  | 206               | 6.15  | 0.91 (0.72-1.15)        | 0.416            |
| Others                                                                                                             | 72             | 3.48  | 85                | 2.54  | 1.22 (0.88-1.69)        | 0.239            |

SNPs on progress and prognosis of EGJA. Last but not least, other environmental and genetic factors were not considered. Further studies are necessary to explore the effect of interactions between environment and gene factors on EGJA risk.

In conclusion, our study demonstrates that *MTHFR* rs1801133 G>A may be associated with the increased risk of EGJA. Meanwhile, *MTHFR* rs3753584 T>C, rs4845882 G>A and rs9651118 T>C polymorphisms decrease the risk of EGJA in Eastern Chinese Han population. The further case-control studies are needed to confirm our findings.

## MATERIALS AND METHODS

### Subjects

Study conducted at the Affiliated Union Hospital of Fujian Medical University, Fujian Medical University Cancer Hospital and the Affiliated People's Hospital of Jiangsu University was approved by the Ethics Committee of Fujian Medical University (Fuzhou, China) and Jiangsu University (Zhenjiang, China). Subjects were enrolled from three hospitals in Eastern China. Our study involved 2,740 study participants, comprising 1,063 histopathologically confirmed sporadic EGJA patients and 1,677 healthy normal controls. Among them, 280 EGJA patients and 840 controls were enrolled from Fujian Medical University Union Hospital and Cancer Hospital of Fujian Medical University from January 2014 to May 2016. In addition, 783 EGJA patients and 837 controls were enrolled from the Affiliated People's Hospital of Jiangsu University between January 2008 and November 2016. All EGJA patients were Siewert type II. The control group involved normal individuals who visited these hospitals for health check. The healthy normal controls were unrelated to the EGJA patients and were cancer-

free individuals. Data of demographic details and risk factors was obtained using a structured questionnaire. The definition of 'ever smokers' were subjects who smoked at least one cigarette per day over 1 year [11], and 'ever drinkers' were subjects who drank no less than three times a week for more than 6 months [11]. The corresponding data are listed in Table 1. The Ethical Committee of Fujian Medical University and Jiangsu University approved the study protocols (No. SQ2015-006-01 and No. 20150083, respectively).

### Selection of SNPs

The *MTHFR* tagging SNPs (upstream and downstream of *MTHFR* gene extending 5 Kb, respectively) were selected from the database of CHB population using the HapMap Project (<http://hapmap.ncbi.nlm.nih.gov/index.html.en>) and Haploview 4.2 software. The major criterion were: (a) MAF  $\geq$  0.05 and call rate  $\geq$  95 %, (b) a HWE  $P \geq$  0.05, (c) a pairwise linkage disequilibrium (LD)  $r^2$  threshold of 0.8 between polymorphisms ( $r^2 > 0.8$ ) [11, 31, 32]. Finally, five *MTHFR* tagging SNPs (rs1801133 G>A, rs3753584 T>C, rs4845882 G>A, rs4846048 A>G and rs9651118 T>C) were eligible and included in this case-control study to evaluate the effect of *MTHFR* polymorphisms with EGJA risk. The primary information of *MTHFR* tagging SNPs is presented in Table 2.

### DNA extraction and genotyping

Each participant donated 2ml blood sample which was stored in an EDTA-anticoagulated tube. We use the Promega Genomic DNA Purification Kit (Promega, Madison, USA) to extract the genomic DNA. SNPscan™ genotyping assay (Genesky Biotechnologies Inc., Shanghai, China) [33, 34] was harnessed to determine

the genotyping of *MTHFR* rs1801133 G>A, rs3753584 T>C, rs4845882 G>A, rs4846048 A>G and rs9651118 T>C polymorphisms. Briefly, 150ng DNA sample was denatured at 98°C for 5min. The ligation reaction was done in an ABI 2720 thermal cycler. We used a 48-plex fluorescence PCR reaction for each ligation product amplification. In an ABI 3730XL sequencer, PCR products were analyzed by capillary electrophoresis. The obtained raw data were conducted by GeneMapper 4.1 software (Applied Biosystems, USA). One hundred and ten DNA samples (4%) were randomly selected to reanalyze the genotypes by different laboratory technicians and the reproducibility was 100%.

### Statistical analysis

Age of EGJA patients and controls was expressed as mean  $\pm$  standard deviation. And a Student's t-test was harnessed to assess the difference for age. The Chi-square test ( $\chi^2$ ) was used to compare age, sex, smoking, drinking and the genotypes distribution of *MTHFR* SNPs in patients and controls. We used multivariate logistic regression analysis to assess the risk of *MTHFR* rs1801133 G>A, rs3753584 T>C, rs4845882 G>A, rs4846048 A>G and rs9651118 T>C polymorphisms and considered the confounders such as sex, age, smoking and drinking status. The crude/adjusted ORs and 95% CIs were calculated using the SAS software (Version 9.4; SAS Institute Inc., Cary, NC, USA). A  $P < 0.05$  (two sided) was considered as statistical significance. In this study, multiple comparisons were conducted by Bonferroni correction [35]. We used a SHESIS software (<http://analysis.bio-x.cn/myAnalysis.php>) [17] to construct *MTHFR* haplotypes.

### ACKNOWLEDGMENTS

We appreciate all subjects who participated in this study. We wish to thank Dr. Yan Liu (Genesky Biotechnologies Inc., Shanghai, China) for technical support.

### CONFLICTS OF INTEREST

The authors have no potential conflicts of interest.

### GRANT SUPPORT

This study was supported in part by Young and Middle-aged Talent Training Project of Health Development Planning Commission in Fujian Province (2016-ZQN-25 and 2014-ZQN-JC-11), Medical Innovation Project of Fujian Province (2014-CX-15 and 2014-CX-18), Nursery Garden Project of Fujian Medical

University (2015MP020), Science and Technology Project of Fujian Province (2060203), Natural Science Foundation of Universities and Colleges of Jiangsu Province (Grant No. 16KJB310002), Senior Talents Scientific Research Foundation of Jiangsu University (Grant No. 16JDG066) and Jiangsu Provincial Key R & D Special Fund (BE2015666).

### REFERENCES

1. Edgren G, Adami HO, Weiderpass E, Nyren O. A global assessment of the oesophageal adenocarcinoma epidemic. *Gut*. 2013; 62:1406–14. <https://doi.org/10.1136/gutjnl-2012-302412>.
2. Dikken JL, Lemmens VE, Wouters MW, Wijnhoven BP, Siersema PD, Nieuwenhuijzen GA, van Sandick JW, Cats A, Verheij M, Coebergh JW, van de Velde CJ. Increased incidence and survival for oesophageal cancer but not for gastric cardia cancer in the Netherlands. *Eur J Cancer*. 2012; 48:1624–32. <https://doi.org/10.1016/j.ejca.2012.01.009>.
3. Jemal A, Siegel R, Xu J, Ward E. Cancer statistics, 2010. *CA Cancer J Clin*. 2010; 60:277–300. <https://doi.org/10.3322/caac.20073>.
4. Jemal A, Center MM, DeSantis C, Ward EM. Global patterns of cancer incidence and mortality rates and trends. *Cancer Epidemiol Biomarkers Prev*. 2010; 19:1893–907. <https://doi.org/10.1158/1055-9965.EPI-10-0437>.
5. de Jonge PJ, van Blankenstein M, Grady WM, Kuipers EJ. Barrett's oesophagus: epidemiology, cancer risk and implications for management. *Gut*. 2014; 63:191–202. <https://doi.org/10.1136/gutjnl-2013-305490>.
6. Lagergren J, Lagergren P. Recent developments in esophageal adenocarcinoma. *CA Cancer J Clin*. 2013; 63:232–48. <https://doi.org/10.3322/caac.21185>.
7. Hur C, Miller M, Kong CY, Dowling EC, Nattinger KJ, Dunn M, Feuer EJ. Trends in esophageal adenocarcinoma incidence and mortality. *Cancer*. 2013; 119:1149–58. <https://doi.org/10.1002/cncr.27834>.
8. Giovannucci E, Rimm EB, Ascherio A, Stampfer MJ, Colditz GA, Willett WC. Alcohol, low-methionine--low-folate diets, and risk of colon cancer in men. *J Natl Cancer Inst*. 1995; 87:265–73.
9. Pelucchi C, Talamini R, Negri E, Levi F, Conti E, Franceschi S, La Vecchia C. Folate intake and risk of oral and pharyngeal cancer. *Ann Oncol*. 2003; 14:1677–81.
10. Duthie SJ. Folic acid deficiency and cancer: Mechanisms of DNA instability. *Br Med Bull*. 1999; 55:578–92.
11. Tang W, Zhang S, Qiu H, Wang L, Sun B, Yin J, Gu H. Genetic variations in *MTHFR* and esophageal squamous cell carcinoma susceptibility in Chinese Han population. *Med Oncol*. 2014; 31:915. <https://doi.org/10.1007/s12032-014-0915-6>.
12. Wang Y, Chen S, Kang M, Tang W, Gu H, Yin J, Huang Z. Genetic variations in *MTHFR* and gastric cardia

- adenocarcinoma susceptibility in the Chinese Han population. *Int J Clin Exp Med*. 2015; 8:18936–44.
13. Hajiesmaeil M, Tafvizi F, Sarmadi S. The effect of methylenetetrahydrofolate reductase polymorphisms on susceptibility to human papilloma virus infection and cervical cancer. *Infect Genet Evol*. 2016; 46:1–6. <https://doi.org/10.1016/j.meegid.2016.10.012>.
  14. Waseem M, Hussain SR, Kumar S, Serajuddin M, Mahdi F, Sonkar SK, Bansal C, Ahmad MK. Association of MTHFR (C677T) gene polymorphism with breast cancer in North India. *Biomark Cancer*. 2016; 8:111–7. <https://doi.org/10.4137/BIC.S40446>.
  15. Song A, Zhao L, Li Y, Wu L, Li Y, Liu X, Lan S. Haplotypes of the MTHFR gene are associated with an increased risk of breast cancer in a Han Chinese population in Gansu province. *IUBMB Life*. 2016; 68:526–34. <https://doi.org/10.1002/iub.1509>.
  16. Gutierrez-Alvarez O, Lares-Asseff I, Galaviz-Hernandez C, Reyes-Espinoza EA, Almanza-Reyes H, Sosa-Macias M, Chairez Hernandez I, Salas-Pacheco JM, Bailon-Soto CE. Involvement of MTHFR and TPMT genes in susceptibility to childhood acute lymphoblastic leukemia (ALL) in mexicans. *Drug Metab Pers Ther*. 2016; 31:41–6. <https://doi.org/10.1515/dmpt-2015-0036>.
  17. Shi YY, He L. SHEsis, a powerful software platform for analyses of linkage disequilibrium, haplotype construction, and genetic association at polymorphism loci. *Cell Res*. 2005; 15:97–8. <https://doi.org/10.1038/sj.cr.7290272>.
  18. Blot WJ, Devesa SS, Kneller RW, Fraumeni JF Jr. Rising incidence of adenocarcinoma of the esophagus and gastric cardia. *JAMA*. 1991; 265:1287–9.
  19. Hasegawa S, Yoshikawa T. Adenocarcinoma of the esophagogastric junction: incidence, characteristics, and treatment strategies. *Gastric Cancer*. 2010; 13:63–73. <https://doi.org/10.1007/s10120-010-0555-2>.
  20. Kusano C, Gotoda T, Khor CJ, Katai H, Kato H, Taniguchi H, Shimoda T. Changing trends in the proportion of adenocarcinoma of the esophagogastric junction in a large tertiary referral center in Japan. *J Gastroenterol Hepatol*. 2008; 23:1662–5. <https://doi.org/10.1111/j.1440-1746.2008.05572.x>.
  21. Zhou Y, Zhang Z, Zhang Z, Wu J, Ren D, Yan X, Wang Q, Wang Y, Wang H, Zhang J, Zhu X, Yang Y, Luo C, et al. A rising trend of gastric cardia cancer in Gansu Province of China. *Cancer Lett*. 2008; 269:18–25. <https://doi.org/10.1016/j.canlet.2008.04.013>.
  22. Chai W, Zhang Z, Ni M, Geng P, Lian Z, Zhang G, Shi LL, Chen J. Genetic association between methylenetetrahydrofolate reductase gene polymorphism and risk of osteonecrosis of the femoral head. *BioMed Res Int*. 2015; 2015:196495. <https://doi.org/10.1155/2015/196495>.
  23. Jain M, Pandey P, Tiwary NK, Jain S. MTHFR C677T polymorphism is associated with hyperlipidemia in women with polycystic ovary syndrome. *J Hum Reprod Sci*. 2012; 5:52–6. <https://doi.org/10.4103/0974-1208.97802>.
  24. Shen H, Xu Y, Zheng Y, Qian Y, Yu R, Qin Y, Wang X, Spitz MR, Wei Q. Polymorphisms of 5,10-methylenetetrahydrofolate reductase and risk of gastric cancer in a chinese population: a case-control study. *Int J Cancer*. 2001; 95:332–6.
  25. Miao X, Xing D, Tan W, Qi J, Lu W, Lin D. Susceptibility to gastric cardia adenocarcinoma and genetic polymorphisms in methylenetetrahydrofolate reductase in an at-risk chinese population. *Cancer Epidemiol Biomarkers Prev*. 2002; 11:1454–8.
  26. Liu H, Jin G, Wang H, Wu W, Liu Y, Qian J, Fan W, Ma H, Miao R, Hu Z, Sun W, Wang Y, Jin L, et al. Association of polymorphisms in one-carbon metabolizing genes and lung cancer risk: a case-control study in chinese population. *Lung Cancer*. 2008; 61:21–9. <https://doi.org/10.1016/j.lungcan.2007.12.001>.
  27. Shen H, Newmann AS, Hu Z, Zhang Z, Xu Y, Wang L, Hu X, Guo J, Wang X, Wei Q. Methylenetetrahydrofolate reductase polymorphisms/haplotypes and risk of gastric cancer: a case-control analysis in China. *Oncol Rep*. 2005; 13:355–60.
  28. Lin VC, Lu TL, Yin HL, Yang SF, Lee YC, Liu CC, Huang CY, Yu CC, Chang TY, Huang SP, Bao BY. Prognostic relevance of methylenetetrahydrofolate reductase polymorphisms for prostate cancer. *Int J Mol Sci*. 2016; 17. <https://doi.org/10.3390/ijms17121996>.
  29. Swartz MD, Peterson CB, Lupo PJ, Wu X, Forman MR, Spitz MR, Hernandez LM, Vannucci M, Shete S. Investigating multiple candidate genes and nutrients in the folate metabolism pathway to detect genetic and nutritional risk factors for lung cancer. *PLoS One*. 2013; 8:e53475. <https://doi.org/10.1371/journal.pone.0053475>.
  30. Lu Q, Jiang K, Li Q, Ji YJ, Chen WL, Xue XH. Polymorphisms in the MTHFR gene are associated with breast cancer risk and prognosis in a chinese population. *Tumour Biol*. 2015; 36:3757–62. <https://doi.org/10.1007/s13277-014-3016-4>.
  31. Carlson CS, Eberle MA, Kruglyak L, Nickerson DA. Mapping complex disease loci in whole-genome association studies. *Nature*. 2004; 429:446–52. <https://doi.org/10.1038/nature02623>.
  32. Tang W, Wang Y, Chen S, Lin J, Chen B, Yu S, Chen Y, Gu H, Kang M. Investigation of cytotoxic T-lymphocyte antigen 4 polymorphisms in gastric cardia adenocarcinoma. *Scand J Immunol*. 2016; 83:212–8. <https://doi.org/10.1111/sji.12409>.
  33. Zheng L, Yin J, Wang L, Wang X, Shi Y, Shao A, Tang W, Ding G, Liu C, Chen S, Gu H. Interleukin 1B rs16944

G>A polymorphism was associated with a decreased risk of esophageal cancer in a Chinese population. *Clin Biochem.* 2013; 46:1469–73. <https://doi.org/10.1016/j.clinbiochem.2013.05.050>.

34. Yin J, Wang L, Shi Y, Shao A, Tang W, Wang X, Ding G, Liu C, Chen S, Gu H. Interleukin 17A rs4711998 A>G

polymorphism was associated with a decreased risk of esophageal cancer in a Chinese population. *Dis Esophagus.* 2014; 27:87–92. <https://doi.org/10.1111/dote.12045>.

35. Bland JM, Altman DG. Multiple significance tests: the bonferroni method. *BMJ.* 1995; 310:170.
